# Supplementary material
Source: HighWire-hosted journal article supplement (https://gh.bmj.com/content/8/4/e005598corr1)

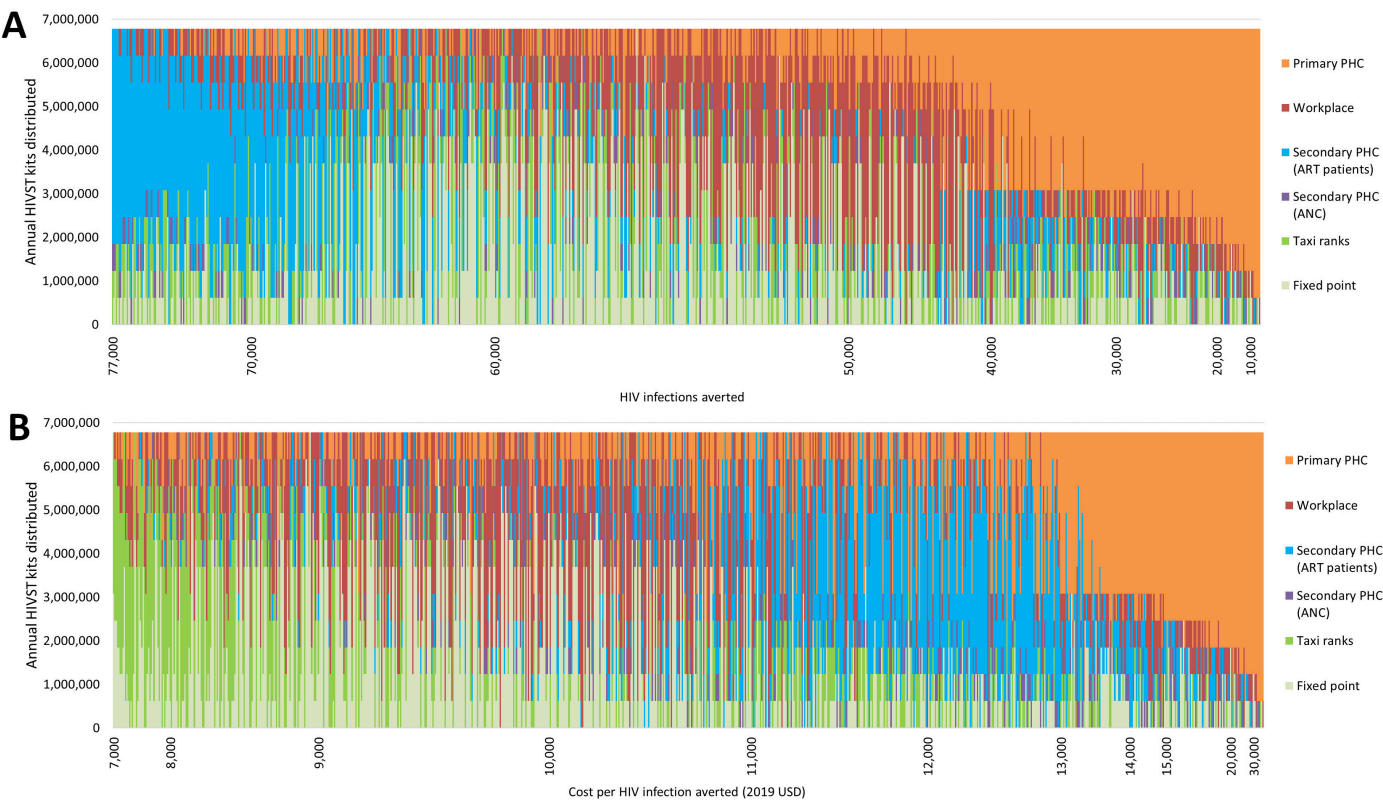

Supplement: inline-supplementary-material-2 [file inline-supplementary-material-2.pdf]

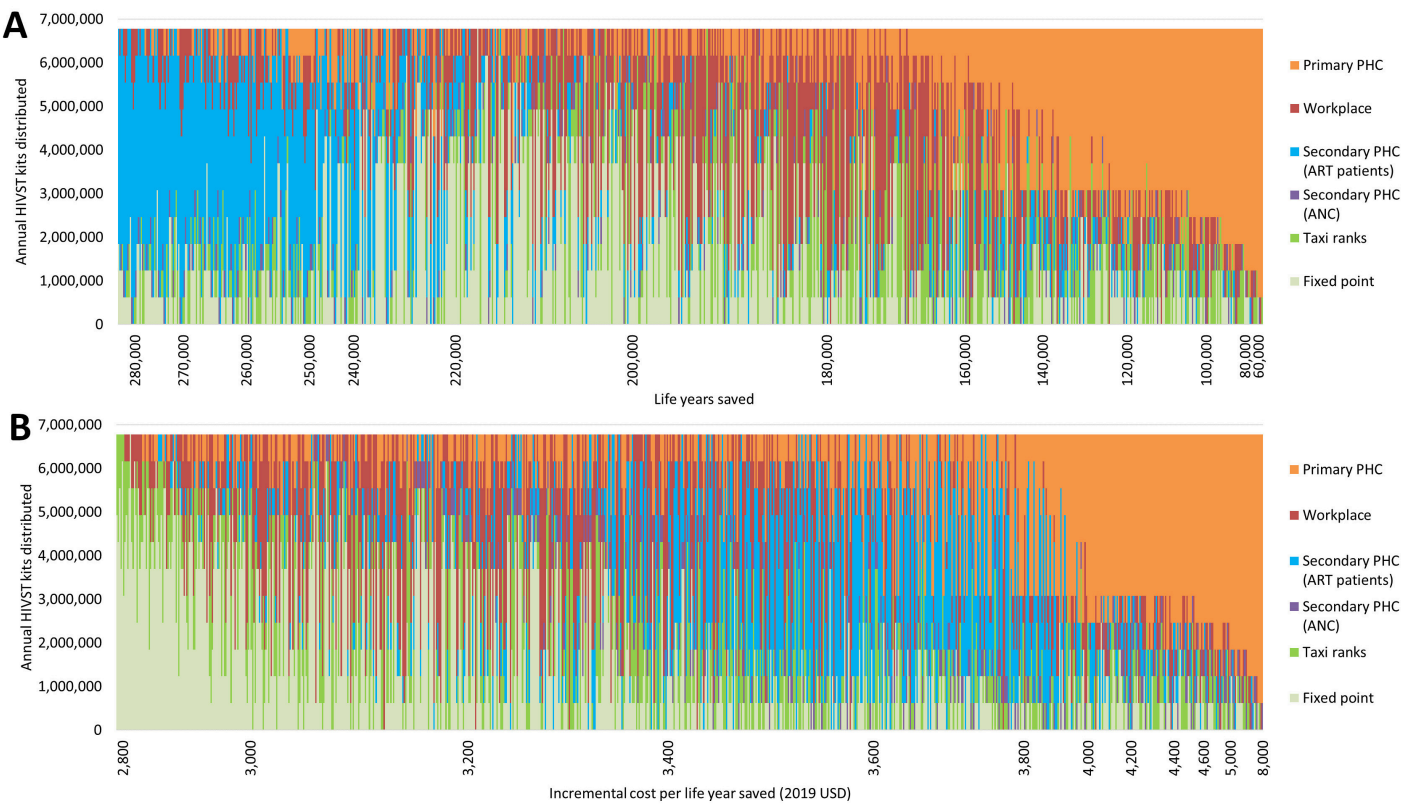

Supplement: inline-supplementary-material-4 [file inline-supplementary-material-4.pdf]
